# Supplementary material for: Benchmark calculations of excess electrons in water cluster cavities: balancing the addition of atom-centered diffuse functions versus floating diffuse functions
Source: Royal Society of Chemistry journal article supplement (doi:10.1039/c6cp04224d), 2016-01-01

**Benchmark Calculations of Excess Electron in Water Cluster Cavity: Balancing  
the Additions of Atom-Centered Diffuse Functions versus Floating Diffuse  
Functions**

Changzhe Zhang, Yuxiang Bu\*

*School of Chemistry and Chemical Engineering, Shandong University, Jinan, 250100,  
P. R. China*

**Supporting Information**

**Contents**

- 1. Structures of Water Cluster Anions**
- 2. The Calculated Electronic Properties for  $5^{12}6^2\text{B}$  with Additional Diffuse Functions**
- 3. The Calculated Electronic Properties for Isomer  $4^66^8\text{B}$  with Additional Diffuse Functions**

## 1. Structures of Water Cluster Anions

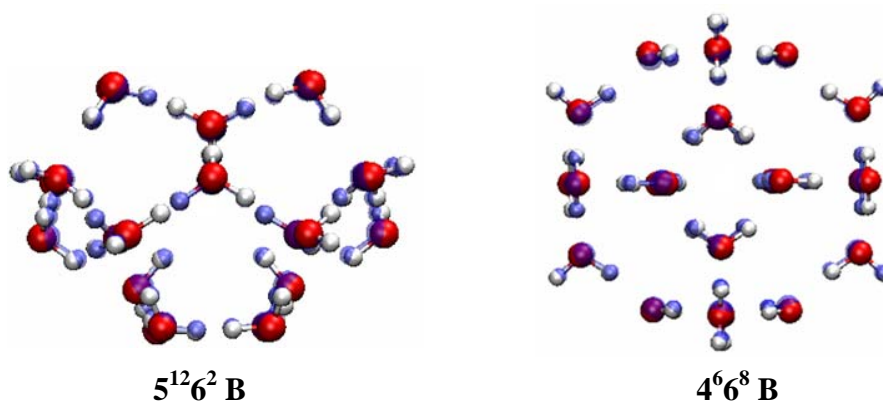

**Figure S1.** The optimized structures for two isomers,  $5^{12}6^2\text{B}$  and  $4^6 8\text{B}$ , of water cluster anions at different levels. The solid structures are optimized at the X3LYP/6-31++G(d) level and the blue ones are optimized at the B3LYP/6-311+3+G(d) level. The corresponding coordinates in angstrom are given in Table S1.

**Table S1.** The structure coordinates for  $5^{12}6^2\text{B}$  and  $4^66^8\text{B}$ . The unit is in Å.

| Isomer: n=24 ( $5^{12}6^2\text{B}$ ) |           |          |           | Geometry: X3LYP/6-31++G(d) |           |           |           |
|--------------------------------------|-----------|----------|-----------|----------------------------|-----------|-----------|-----------|
|                                      | X         | Y        | Z         |                            | X         | Y         | Z         |
| O                                    | 0.000000  | 0.000000 | 0.000000  | H                          | 1.834403  | 0.259674  | -0.672276 |
| O                                    | 0.000000  | 0.000000 | 2.810796  | H                          | 5.916372  | 2.821931  | 3.192246  |
| O                                    | 2.543711  | 0.000000 | 3.652892  | H                          | 3.328045  | 4.456343  | 0.038776  |
| O                                    | 3.093090  | 1.956783 | 5.725570  | H                          | 3.666336  | 5.915144  | 4.453780  |
| O                                    | 5.365906  | 3.425705 | 4.962496  | H                          | -0.461757 | -0.736384 | 3.262227  |
| O                                    | 4.644886  | 5.987785 | 4.649991  | H                          | -1.158989 | 3.027164  | -0.089794 |
| O                                    | 5.605352  | 7.184852 | 2.186276  | H                          | -0.371641 | 3.256001  | -2.057961 |
| O                                    | 3.428787  | 8.418247 | 0.902837  | H                          | 0.225534  | 5.537593  | -2.244369 |
| O                                    | 3.036749  | 7.198409 | -1.450522 | H                          | 2.083067  | 7.022660  | -1.653578 |
| O                                    | 0.268081  | 6.499188 | -1.966499 | H                          | 3.257172  | 7.980277  | -0.003119 |
| O                                    | 0.174119  | 3.795647 | -2.731011 | H                          | 4.836174  | 7.631443  | 1.725229  |
| O                                    | -1.256238 | 2.454623 | -0.904762 | H                          | 5.031244  | 6.413461  | 3.843096  |
| O                                    | 2.789218  | 0.397388 | -0.882528 | H                          | 5.126242  | 4.410562  | 4.841796  |
| O                                    | 3.669315  | 1.408383 | 1.516536  | H                          | 3.905427  | 2.481554  | 5.464089  |
| O                                    | 6.186991  | 2.544141 | 2.282955  | H                          | 2.712439  | 0.619969  | 4.407039  |
| O                                    | 6.328136  | 4.799057 | 0.604054  | H                          | 0.957472  | -0.007186 | 3.164662  |
| O                                    | 3.929434  | 4.649451 | -0.729426 | H                          | -0.372984 | -0.860834 | -0.280575 |
| O                                    | 2.884490  | 2.677997 | -2.529268 | H                          | 1.821134  | 8.057549  | 1.946040  |
| O                                    | 0.995534  | 7.855399 | 2.450741  | H                          | 1.485225  | 3.089001  | 5.597577  |
| O                                    | 2.004770  | 5.558725 | 3.837544  | H                          | 0.361792  | 3.960562  | 1.318048  |
| O                                    | 0.759547  | 3.749815 | 5.490211  | H                          | 3.029180  | 0.405961  | 2.877710  |
| O                                    | -1.098410 | 2.561930 | 3.740362  | H                          | 6.321694  | 7.851364  | 2.225424  |
| O                                    | -0.630584 | 4.025668 | 1.320933  | H                          | -0.233445 | 6.998999  | -2.642928 |
| O                                    | -0.909616 | 6.695662 | 0.734489  | H                          | -0.200258 | 3.589017  | -3.612153 |
| H                                    | 2.824459  | 1.159841 | -1.529217 | H                          | 3.133803  | 2.245864  | 1.547464  |
| H                                    | 3.448414  | 1.000617 | 0.618557  | H                          | 6.152273  | 5.576650  | 1.186497  |
| H                                    | 5.406891  | 2.039145 | 1.931925  | H                          | 1.979349  | 3.066267  | -2.613867 |
| H                                    | 6.356302  | 4.001039 | 1.206695  | H                          | 2.149851  | 4.979879  | 3.041925  |
| H                                    | 4.856851  | 4.657004 | -0.327912 | H                          | -0.747889 | 1.694496  | 3.421182  |
| H                                    | 3.391540  | 3.338144 | -1.987143 | H                          | -0.505598 | 6.717294  | -0.166126 |
| H                                    | 1.248400  | 7.111207 | 3.058229  | H                          | -0.858642 | 1.583945  | -0.648961 |
| H                                    | 1.485299  | 4.977668 | 4.480901  | H                          | -0.000193 | -0.011181 | 1.001795  |
| H                                    | 0.058825  | 3.304940 | 4.931758  | H                          | 3.252016  | 1.650131  | 6.641881  |
| H                                    | -1.076897 | 3.151179 | 2.940879  | H                          | 6.138755  | 3.406220  | 5.563827  |
| H                                    | -0.819482 | 5.007562 | 1.173756  | H                          | 3.492633  | 9.380404  | 0.731274  |
| H                                    | -0.271267 | 7.175382 | 1.337161  | H                          | 3.433935  | 6.293228  | -1.294774 |

---

**Isomer: n=24 (5<sup>12</sup>6<sup>2</sup> B)****Geometry: B3LYP/6-311+3+G(d)**

---

|   | X         | Y         | Z         |   | X         | Y         | Z         |
|---|-----------|-----------|-----------|---|-----------|-----------|-----------|
| O | 4.129436  | 2.459760  | -0.764238 | H | 3.179830  | 1.687393  | -2.448738 |
| O | 2.358367  | 4.192957  | 0.710200  | H | -3.107655 | 1.772535  | -2.391883 |
| O | 0.047190  | 4.540578  | -0.764889 | H | -0.050386 | -1.485903 | -1.559526 |
| O | -2.459276 | 4.128955  | 0.764640  | H | -3.801898 | 0.043478  | 1.376686  |
| O | -4.193045 | 2.358375  | -0.709803 | H | 2.615763  | 5.059606  | 0.995590  |
| O | -4.541329 | 0.047361  | 0.765546  | H | 3.801685  | -0.043317 | 1.375771  |
| O | -4.129597 | -2.459445 | -0.763518 | H | 4.306197  | -1.534935 | -0.216210 |
| O | -2.357975 | -4.192774 | 0.710298  | H | 3.010079  | -3.518918 | 0.268514  |
| O | -0.047087 | -4.540557 | -0.765226 | H | 0.756422  | -4.455836 | -0.257596 |
| O | 2.459892  | -4.129169 | 0.763531  | H | -1.534964 | -4.305741 | 0.215594  |
| O | 4.193094  | -2.357977 | -0.710831 | H | -3.519256 | -3.009531 | -0.268499 |
| O | 4.541093  | -0.047110 | 0.764603  | H | -4.456770 | -0.756097 | 0.257808  |
| O | 2.703580  | 1.446522  | -3.237602 | H | -4.306263 | 1.535329  | -0.215221 |
| O | 0.066556  | 2.103381  | -2.293337 | H | -3.009604 | 3.518971  | 0.269452  |
| O | -2.665963 | 1.473943  | -3.181353 | H | -0.756192 | 4.455897  | -0.257051 |
| O | -2.704447 | -1.446407 | -3.237252 | H | 1.535275  | 4.305900  | 0.215627  |
| O | -0.067246 | -2.103331 | -2.293551 | H | 4.844437  | 3.024372  | -1.025867 |
| O | 2.665170  | -1.473752 | -3.181775 | H | -1.772108 | -3.107505 | 2.392256  |
| O | -1.473378 | -2.665679 | 3.181599  | H | -1.686991 | 3.179453  | 2.449028  |
| O | -2.103746 | 0.066548  | 2.293332  | H | 1.486161  | -0.050176 | 1.558796  |
| O | -1.446033 | 2.703182  | 3.237854  | H | 0.043309  | 3.801237  | -1.376136 |
| O | 1.474253  | 2.665134  | 3.181427  | H | -4.844580 | -3.024193 | -1.024905 |
| O | 2.103723  | -0.066997 | 2.292708  | H | 3.024427  | -4.844448 | 1.024570  |
| O | 1.446987  | -2.703830 | 3.237327  | H | 5.059662  | -2.615403 | -0.996440 |
| H | 2.722599  | 0.489622  | -3.280899 | H | 0.049704  | 1.485885  | -1.559371 |
| H | 0.892079  | 1.919939  | -2.749015 | H | -3.180510 | -1.687237 | -2.448261 |
| H | -1.745157 | 1.698793  | -3.056187 | H | 3.107049  | -1.772431 | -2.392443 |
| H | -2.723481 | -0.489510 | -3.280593 | H | -1.486417 | 0.049674  | 1.559227  |
| H | -0.892865 | -1.919962 | -2.749086 | H | 1.772695  | 3.107162  | 2.392090  |
| H | 1.744404  | -1.698698 | -3.056488 | H | 1.687870  | -3.180129 | 2.448497  |
| H | -1.698459 | -1.744935 | 3.056390  | H | 4.456547  | 0.756419  | 0.256978  |
| H | -1.919994 | 0.891952  | 2.749104  | H | 3.519320  | 3.009965  | -0.269074 |
| H | -0.489129 | 2.722234  | 3.281049  | H | -3.023705 | 4.844156  | 1.026120  |
| H | 1.699205  | 1.744401  | 3.055886  | H | -5.059618 | 2.616122  | -0.995108 |
| H | 1.920336  | -0.892504 | 2.748442  | H | -2.615446 | -5.059442 | 0.995562  |
| H | 0.490092  | -2.722970 | 3.280684  | H | -0.043404 | -3.801219 | -1.376477 |

---

**Isomer: n=24 (5<sup>12</sup>6<sup>2</sup>B)      Geometry: B3LYP/6-31+G(d)-6-311+2+G(d,p++)**

|   | X         | Y        | Z         |    | X         | Y         | Z         |
|---|-----------|----------|-----------|----|-----------|-----------|-----------|
| O | 0.054659  | 0.051276 | 0.019058  | H  | 1.854772  | 0.317472  | -0.630193 |
| O | 0.026937  | 0.044890 | 2.782878  | H  | 5.883348  | 2.822284  | 3.178439  |
| O | 2.531696  | 0.082481 | 3.602666  | H  | 3.280295  | 4.405809  | 0.080502  |
| O | 3.079350  | 1.988821 | 5.665030  | H  | 3.619780  | 5.845773  | 4.351807  |
| O | 5.320782  | 3.424202 | 4.920125  | H  | -0.411784 | -0.695109 | 3.230055  |
| O | 4.586086  | 5.931860 | 4.569336  | H  | -1.027733 | 3.056466  | -0.038474 |
| O | 5.556370  | 7.121671 | 2.156962  | H  | -0.315479 | 3.277261  | -1.991013 |
| O | 3.417421  | 8.358426 | 0.918174  | H  | 0.252820  | 5.514975  | -2.192647 |
| O | 3.022838  | 7.124770 | -1.376648 | H  | 2.076042  | 6.958393  | -1.577899 |
| O | 0.292907  | 6.466117 | -1.906218 | H  | 3.239792  | 7.904393  | 0.027898  |
| O | 0.204870  | 3.813560 | -2.677929 | H  | 4.794633  | 7.578237  | 1.710192  |
| O | -1.156953 | 2.493314 | -0.847800 | H  | 4.979657  | 6.351417  | 3.773512  |
| O | 2.798416  | 0.449588 | -0.853141 | H  | 5.068076  | 4.396633  | 4.776305  |
| O | 3.636312  | 1.486151 | 1.516538  | H  | 3.891225  | 2.503034  | 5.410732  |
| O | 6.139661  | 2.547604 | 2.273838  | H  | 2.696947  | 0.688374  | 4.357530  |
| O | 6.266738  | 4.769024 | 0.607882  | H  | 0.979996  | 0.057950  | 3.131550  |
| O | 3.877765  | 4.608181 | -0.681216 | H  | -0.311891 | -0.798718 | -0.268235 |
| O | 2.878420  | 2.690053 | -2.496503 | H  | 1.821749  | 8.022371  | 1.943886  |
| O | 1.004370  | 7.817287 | 2.443228  | H  | 1.508135  | 3.104356  | 5.515852  |
| O | 1.994212  | 5.520649 | 3.753663  | H  | 0.461845  | 3.967145  | 1.357309  |
| O | 0.779347  | 3.751259 | 5.425965  | H  | 2.998093  | 0.509023  | 2.835137  |
| O | -1.061536 | 2.574351 | 3.709281  | H  | 6.277346  | 7.768751  | 2.187562  |
| O | -0.525945 | 4.021224 | 1.344096  | H  | -0.193910 | 6.969363  | -2.576438 |
| O | -0.872347 | 6.655192 | 0.754458  | H  | -0.192820 | 3.605003  | -3.537217 |
| H | 2.824841  | 1.204893 | -1.495841 | H  | 3.107355  | 2.321537  | 1.539416  |
| H | 3.425707  | 1.079266 | 0.625829  | H  | 6.071742  | 5.538934  | 1.179743  |
| H | 5.344766  | 2.079296 | 1.927087  | H  | 1.981276  | 3.073303  | -2.584481 |
| H | 6.295300  | 3.980916 | 1.209816  | H  | 2.125381  | 4.950001  | 2.956547  |
| H | 4.797528  | 4.614172 | -0.284655 | H  | -0.719179 | 1.711279  | 3.397377  |
| H | 3.364636  | 3.336570 | -1.933657 | H  | -0.471214 | 6.667227  | -0.137876 |
| H | 1.255498  | 7.057892 | 3.018899  | H  | -0.766290 | 1.625175  | -0.607297 |
| H | 1.484805  | 4.944187 | 4.395135  | H  | 0.039807  | 0.036487  | 1.012918  |
| H | 0.085343  | 3.306990 | 4.873565  | H  | 3.218860  | 1.700524  | 6.579810  |
| H | -1.000513 | 3.160537 | 2.919467  | H  | 6.076147  | 3.431238  | 5.527904  |
| H | -0.724818 | 4.991307 | 1.193646  | H  | 3.489869  | 9.305961  | 0.725877  |
| H | -0.237437 | 7.135397 | 1.346449  | H  | 3.402259  | 6.221790  | -1.205677 |
|   |           |          |           | Bq | 1.944314  | 4.109002  | 1.720302  |

| Isomer: n=24 (4 <sup>6</sup> 6 <sup>8</sup> B) |           |           | Geometry: X3LYP/6-31++G(d) |   |           |           |           |
|------------------------------------------------|-----------|-----------|----------------------------|---|-----------|-----------|-----------|
|                                                | X         | Y         | Z                          |   | X         | Y         | Z         |
| O                                              | -4.735642 | 0.228668  | -1.320304                  | H | 0.509247  | 3.208739  | 2.682802  |
| O                                              | -2.254896 | 0.099324  | -2.512210                  | H | 1.396640  | 1.337975  | 3.447827  |
| O                                              | -0.626335 | -1.903906 | -3.715820                  | H | 3.220044  | -0.161555 | 2.239705  |
| O                                              | -0.418905 | -3.984856 | -2.031394                  | H | 4.022627  | -0.957230 | -1.869510 |
| O                                              | -2.197186 | -3.759506 | 0.220653                   | H | -1.383935 | 4.007899  | -0.560042 |
| O                                              | -4.268045 | -1.987205 | 0.507184                   | H | -0.234708 | -1.393063 | 3.473373  |
| O                                              | -4.078217 | 2.358259  | 0.563832                   | H | -4.579915 | 1.003769  | -0.722621 |
| O                                              | -3.940922 | 0.150583  | 2.441015                   | H | 0.155696  | -1.326859 | -3.500529 |
| O                                              | 0.095029  | -4.065446 | 1.966168                   | H | -1.501293 | -3.796487 | 0.927248  |
| O                                              | 1.892614  | -3.996367 | -0.293637                  | H | -3.224533 | 2.883933  | 0.427428  |
| O                                              | 1.210602  | -0.003995 | -2.701064                  | H | 0.264480  | -3.308121 | 2.623567  |
| O                                              | -0.506782 | 2.028624  | -3.666741                  | H | 2.215917  | -0.050077 | -2.740411 |
| O                                              | 4.735554  | -0.228420 | 1.320257                   | H | 4.107238  | 0.619077  | -1.838558 |
| O                                              | 4.267866  | 1.987113  | -0.507472                  | H | -1.188729 | 3.914779  | 0.988938  |
| O                                              | 2.197078  | 3.759673  | -0.221280                  | H | 1.310676  | -1.515746 | 3.389856  |
| O                                              | 0.419008  | 3.984647  | 2.030883                   | H | -4.107090 | -0.619293 | 1.838532  |
| O                                              | 0.626530  | 1.904404  | 3.715753                   | H | 1.188763  | -3.914952 | -0.989230 |
| O                                              | 2.255093  | -0.099232 | 2.512848                   | H | -1.310613 | 1.515734  | -3.389274 |
| O                                              | 4.078285  | -2.358316 | -0.563724                  | H | 3.224509  | -2.883905 | -0.427577 |
| O                                              | 3.941069  | -0.150769 | -2.441083                  | H | -0.264742 | 3.308592  | -2.623891 |
| O                                              | -0.095171 | 4.066058  | -1.966661                  | H | -2.215770 | 0.050110  | 2.740739  |
| O                                              | -1.892595 | 3.996286  | 0.293356                   | H | 4.579769  | -1.003576 | 0.722664  |
| O                                              | -1.210433 | 0.004368  | 2.701632                   | H | 1.501250  | 3.797010  | -0.927925 |
| O                                              | 0.506788  | -2.028587 | 3.667262                   | H | -0.155543 | 1.327160  | 3.501133  |
| H                                              | -3.445104 | -2.558282 | 0.369198                   | H | -1.768839 | 0.056959  | -1.648792 |
| H                                              | -1.681630 | -3.798783 | -0.627912                  | H | -0.515491 | -4.801086 | -2.564646 |
| H                                              | -0.509106 | -3.208817 | -2.683138                  | H | -4.992008 | -2.623531 | 0.681768  |
| H                                              | -1.396444 | -1.337732 | -3.447365                  | H | -4.763290 | 3.031175  | 0.757444  |
| H                                              | -3.219875 | 0.161671  | -2.239150                  | H | 0.091207  | -4.890340 | 2.495179  |
| H                                              | -4.647790 | -0.572817 | -0.743476                  | H | 1.001099  | -0.012518 | -1.730289 |
| H                                              | -4.022448 | 0.957015  | 1.869395                   | H | 4.763365  | -3.031308 | -0.757064 |
| H                                              | 1.383868  | -4.007719 | 0.559707                   | H | -0.091892 | 4.890899  | -2.495744 |
| H                                              | 0.234755  | 1.393141  | -3.472863                  | H | -1.000741 | 0.012579  | 1.730892  |
| H                                              | 4.647393  | 0.572994  | 0.743375                   | H | 4.991998  | 2.623301  | -0.681847 |
| H                                              | 3.444984  | 2.558320  | -0.369671                  | H | 0.515526  | 4.800984  | 2.563976  |
| H                                              | 1.681536  | 3.798835  | 0.627308                   | H | 1.769000  | -0.057116 | 1.649434  |

---

**Isomer: n=24 (4<sup>6</sup>6<sup>8</sup>B)****Geometry: X3LYP/6-311+3+G(d)**

---

|   | X         | Y         | Z         |   | X         | Y         | Z         |
|---|-----------|-----------|-----------|---|-----------|-----------|-----------|
| O | -4.683827 | -0.241935 | -1.586842 | H | 0.041447  | 3.375888  | 2.743386  |
| O | -2.081075 | -0.111480 | -2.775625 | H | 0.998173  | 1.527474  | 3.715618  |
| O | -0.222252 | -2.032568 | -3.953437 | H | 3.011893  | 0.158087  | 2.550167  |
| O | 0.056260  | -4.118502 | -2.134634 | H | 4.345498  | -0.527745 | -1.731578 |
| O | -1.839602 | -4.098215 | 0.154244  | H | -1.760178 | 3.900881  | -0.627741 |
| O | -4.138291 | -2.461013 | 0.331696  | H | -0.329629 | -1.499543 | 3.798700  |
| O | -4.380090 | 2.010415  | 0.347451  | H | -4.624263 | 0.522535  | -1.018675 |
| O | -4.293393 | -0.234924 | 2.303050  | H | 0.501459  | -1.425938 | -3.802369 |
| O | 0.397725  | -4.115943 | 2.114118  | H | -1.199675 | -4.036962 | 0.860665  |
| O | 2.278365  | -3.891831 | -0.174709 | H | -3.578323 | 2.540594  | 0.279171  |
| O | 1.522784  | 0.100016  | -3.009953 | H | 0.419998  | -3.370347 | 2.726611  |
| O | -0.459937 | 2.019934  | -3.940811 | H | 2.477779  | 0.147710  | -2.934320 |
| O | 4.683698  | 0.241979  | 1.586814  | H | 4.268465  | 0.994112  | -1.725328 |
| O | 4.138208  | 2.460999  | -0.331804 | H | -1.634370 | 3.891671  | 0.880032  |
| O | 1.839529  | 4.098234  | -0.154514 | H | 1.171065  | -1.427672 | 3.701697  |
| O | -0.056181 | 4.118301  | 2.134468  | H | -4.268303 | -0.994154 | 1.725273  |
| O | 0.222340  | 2.032631  | 3.953637  | H | 1.634446  | -3.891793 | -0.880190 |
| O | 2.081101  | 0.111437  | 2.775907  | H | -1.171073 | 1.427600  | -3.701472 |
| O | 4.380146  | -2.010434 | -0.347437 | H | 3.578376  | -2.540620 | -0.279247 |
| O | 4.293516  | 0.234870  | -2.303090 | H | -0.420105 | 3.370488  | -2.726763 |
| O | -0.397852 | 4.116152  | -2.114350 | H | -2.477744 | -0.147709 | 2.934539  |
| O | -2.278332 | 3.891823  | 0.174589  | H | 4.624111  | -0.522507 | 1.018672  |
| O | -1.522757 | -0.099962 | 3.010243  | H | 1.199597  | 4.037113  | -0.860942 |
| O | 0.459899  | -2.020003 | 3.940953  | H | -0.501395 | 1.426008  | 3.802655  |
| H | -3.282114 | -2.897835 | 0.263058  | H | -1.626934 | -0.089753 | -1.933186 |
| H | -1.322650 | -4.047238 | -0.647273 | H | 0.064094  | -4.899039 | -2.672571 |
| H | -0.041357 | -3.376021 | -2.743474 | H | -4.772030 | -3.162830 | 0.401002  |
| H | -0.998102 | -1.527460 | -3.715370 | H | -5.087447 | 2.636888  | 0.426007  |
| H | -3.011885 | -0.158102 | -2.549951 | H | 0.466508  | -4.896179 | 2.648140  |
| H | -4.544449 | -0.998800 | -1.022533 | H | 1.205111  | 0.080489  | -2.106603 |
| H | -4.345333 | 0.527697  | 1.731540  | H | 5.087531  | -2.636901 | -0.425786 |
| H | 1.760152  | -3.900763 | 0.627585  | H | -0.466681 | 4.896328  | -2.648454 |
| H | 0.329614  | 1.499529  | -3.798489 | H | -1.205029 | -0.080415 | 2.106912  |
| H | 4.544236  | 0.998819  | 1.022491  | H | 4.771956  | 3.162826  | -0.400926 |
| H | 3.282018  | 2.897814  | -0.263293 | H | -0.063995 | 4.898897  | 2.672320  |
| H | 1.322590  | 4.047135  | 0.647004  | H | 1.626911  | 0.089715  | 1.933493  |

---

**Isomer: n=24 (4<sup>6</sup>6<sup>8</sup>B)      Geometry: B3LYP/6-31+G(d)-6-311+2+G(d,p++)**

|   | X         | Y         | Z         |    | X         | Y         | Z         |
|---|-----------|-----------|-----------|----|-----------|-----------|-----------|
| O | -4.541535 | 0.207833  | -1.281665 | H  | 0.507701  | 3.116131  | 2.672714  |
| O | -2.079940 | 0.118639  | -2.419379 | H  | 1.312203  | 1.276422  | 3.393816  |
| O | -0.608845 | -1.872165 | -3.736106 | H  | 3.027760  | -0.153204 | 2.121456  |
| O | -0.445823 | -3.867624 | -2.005984 | H  | 4.050872  | -0.937754 | -1.915212 |
| O | -2.165728 | -3.683347 | 0.246864  | H  | -1.360033 | 3.825681  | -0.536184 |
| O | -4.198594 | -1.946304 | 0.560561  | H  | -0.329001 | -1.390390 | 3.587012  |
| O | -4.026330 | 2.291596  | 0.602652  | H  | -4.418199 | 0.978587  | -0.684491 |
| O | -4.010237 | 0.150527  | 2.493542  | H  | 0.208342  | -1.336004 | -3.607723 |
| O | 0.110407  | -3.928133 | 1.923941  | H  | -1.454538 | -3.704564 | 0.926921  |
| O | 1.842542  | -3.848901 | -0.325209 | H  | -3.169193 | 2.802578  | 0.489290  |
| O | 1.326783  | -0.020513 | -2.903427 | H  | 0.237614  | -3.201288 | 2.613379  |
| O | -0.446592 | 1.997949  | -3.708360 | H  | 2.323556  | -0.069651 | -2.886421 |
| O | 4.535458  | -0.207531 | 1.276648  | H  | 4.117422  | 0.622527  | -1.900052 |
| O | 4.195750  | 1.946920  | -0.565963 | H  | -1.138020 | 3.794126  | 0.997027  |
| O | 2.159026  | 3.679126  | -0.254833 | H  | 1.191935  | -1.452665 | 3.370468  |
| O | 0.440307  | 3.863691  | 1.997242  | H  | -4.116995 | -0.621091 | 1.894377  |
| O | 0.610467  | 1.877347  | 3.737836  | H  | 1.132585  | -3.798061 | -1.004872 |
| O | 2.075579  | -0.117338 | 2.418955  | H  | -1.197412 | 1.453530  | -3.374138 |
| O | 4.019319  | -2.290052 | -0.609180 | H  | 3.162058  | -2.800909 | -0.496601 |
| O | 4.008586  | -0.148629 | -2.499488 | H  | -0.244959 | 3.206076  | -2.622820 |
| O | -0.117115 | 3.932045  | -1.932718 | H  | -2.325611 | 0.075877  | 2.885423  |
| O | -1.848316 | 3.848095  | 0.317906  | H  | 4.410664  | -0.977823 | 0.679215  |
| O | -1.328840 | 0.029322  | 2.905485  | H  | 1.449077  | 3.702970  | -0.935948 |
| O | 0.439662  | -1.996690 | 3.702162  | H  | -0.207832 | 1.342022  | 3.613476  |
| H | -3.387432 | -2.525409 | 0.436932  | H  | -1.570049 | 0.091522  | -1.579404 |
| H | -1.675617 | -3.686659 | -0.606497 | H  | -0.546840 | -4.689545 | -2.511252 |
| H | -0.510479 | -3.116309 | -2.677646 | H  | -4.938549 | -2.566296 | 0.656278  |
| H | -1.312403 | -1.273039 | -3.392793 | H  | -4.712321 | 2.969081  | 0.709865  |
| H | -3.032768 | 0.154115  | -2.123752 | H  | 0.140697  | -4.767425 | 2.409519  |
| H | -4.481501 | -0.581867 | -0.699675 | H  | 1.071827  | -0.012922 | -1.954056 |
| H | -4.053639 | 0.939319  | 1.908914  | H  | 4.705458  | -2.967793 | -0.713793 |
| H | 1.353646  | -3.824678 | 0.528517  | H  | -0.146653 | 4.772093  | -2.417006 |
| H | 0.323490  | 1.393835  | -3.591503 | H  | -1.070725 | 0.027353  | 1.956865  |
| H | 4.475652  | 0.582421  | 0.694984  | H  | 4.935164  | 2.568125  | -0.658017 |
| H | 3.383251  | 2.524586  | -0.444053 | H  | 0.543176  | 4.688365  | 2.497668  |
| H | 1.667560  | 3.679457  | 0.597815  | H  | 1.563984  | -0.088969 | 1.579838  |
|   |           |           |           | Bq | 0.130572  | 0.031752  | 0.170055  |



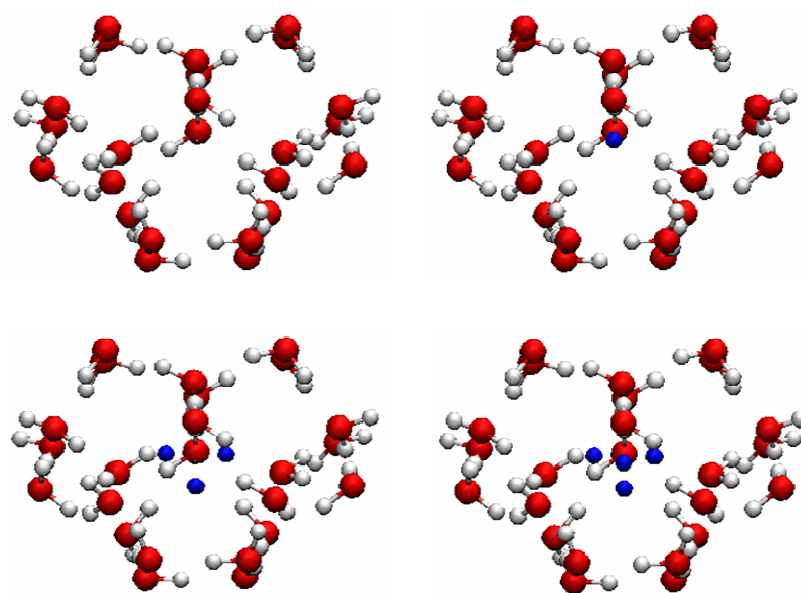

**Figure S2.** The geometric structures for isomer  $5^{12}6^2B$  with different number of additional ghost atoms ( $n=0,1,3,4$ ). The blue circles denote the position where ghost atoms located.

## 2. The Calculated Electronic Properties for $5^{12}\zeta^2\text{B}$ with Additional Diffuse Functions

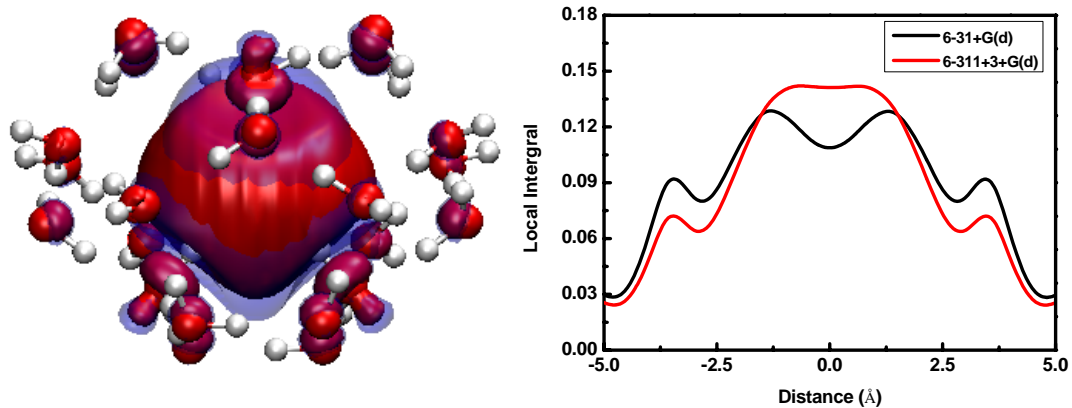

**Figure S3.** The spin density distributions (isovalue=0.004) and corresponding local integral along the z-axis for isomer  $5^{12}\zeta^2\text{B}$  with different basis sets. The blue and red surfaces present the contour map at 6-31+G(d) and 6-311+3+G(d) basis set levels, respectively.

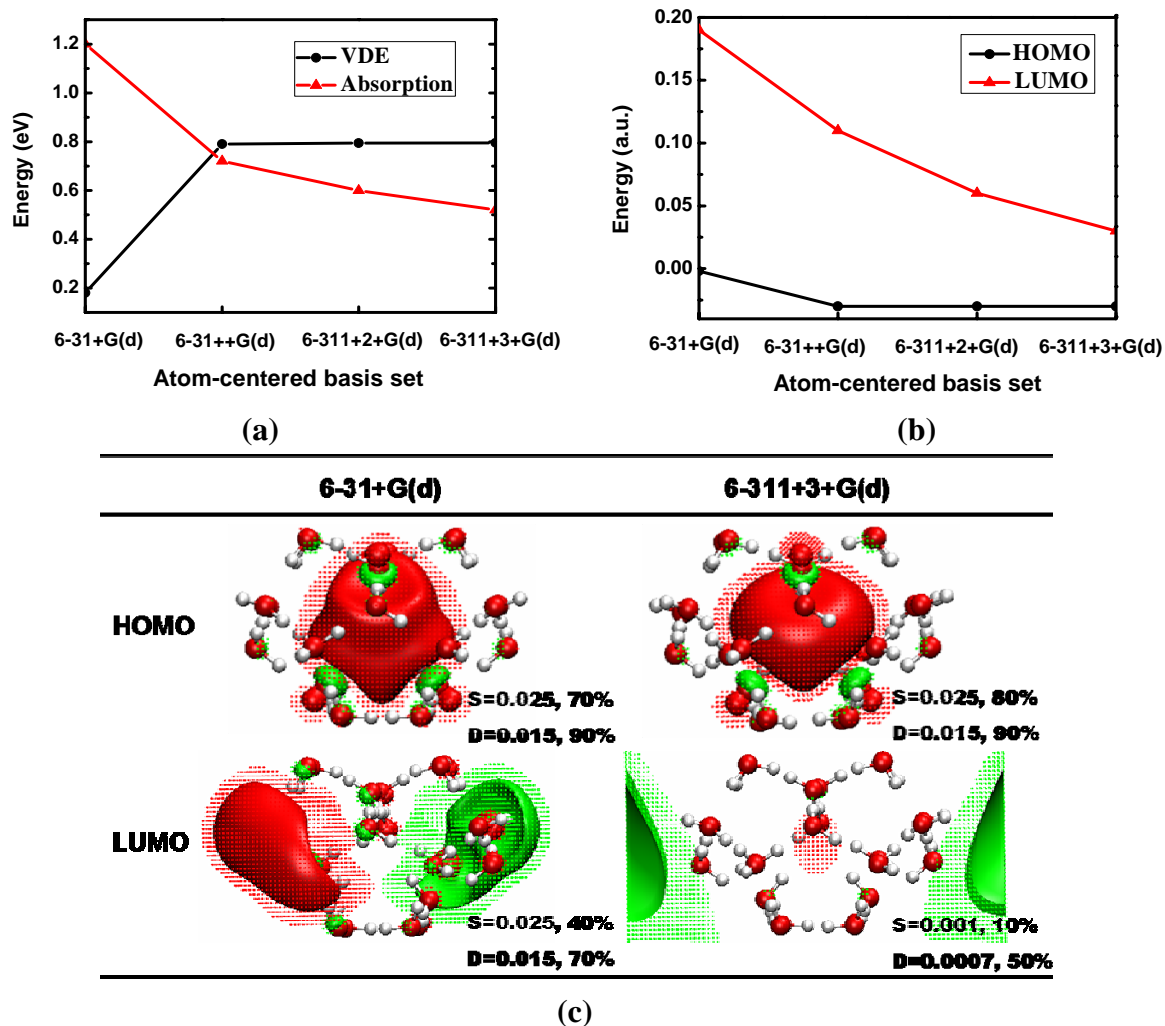

**Figure S4.** The calculated VDEs (a), the HOMO and LUMO energies (b) and distributions (c) of the  $(\text{H}_2\text{O})_{24}^-$   $5^{12}6^2\text{B}$  isomer at mp2 level. The vis absorption maxima at TDDFT/B3LYP level, with respect to different atom-centered basis sets are also shown in (a).

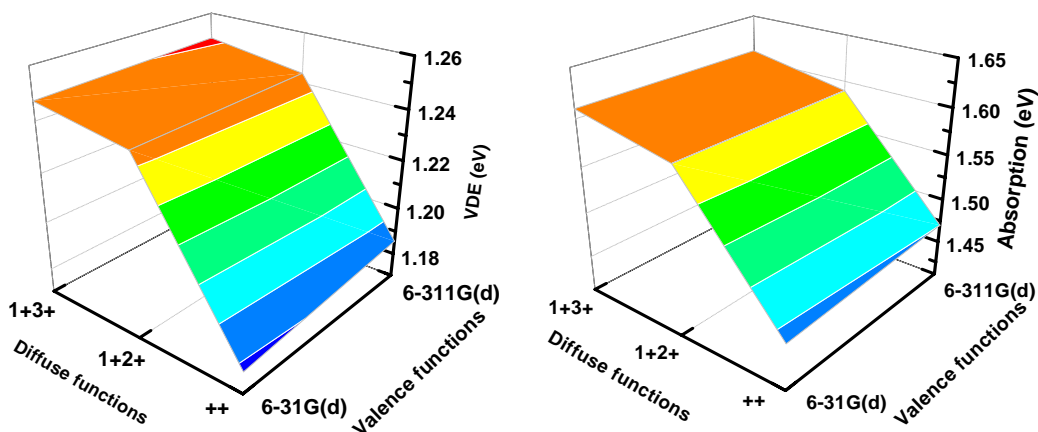

**Figure S5.** The calculated VDEs and vis absorption maxima for the  $(\text{H}_2\text{O})_{24}^- 5^{12}6^2\text{B}$  isomer using a fixed atom-centered basis set [6-31+G(d)] at the B3LYP level for all  $\text{H}_2\text{O}$  molecules augmented by one H ghost atom with different ghost-atom-based diffuse and valence functions

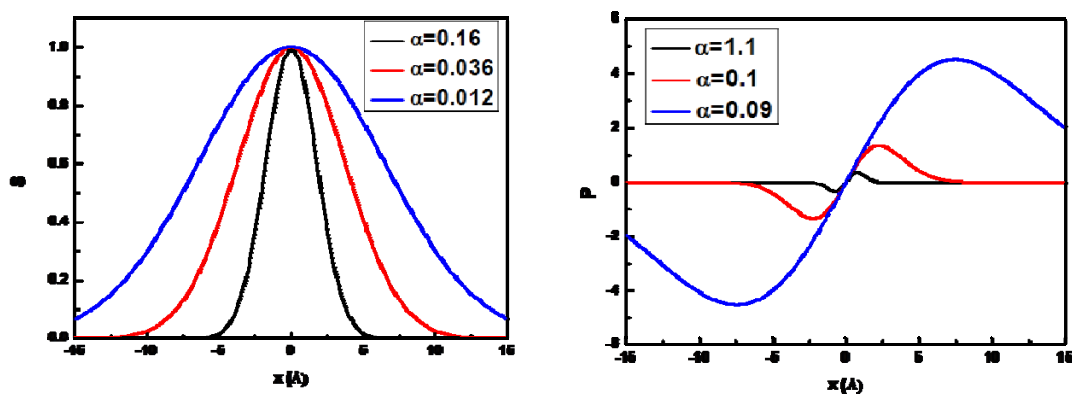

**Figure S6.** The employed s (left) and p (right) diffuse functions with different orbital coefficients. The s and p diffuse functions are given as  $s = e^{-\alpha \cdot x^2}$  and  $p = x \cdot e^{-\alpha \cdot x^2}$ , respectively, where  $\alpha$  denotes the orbital coefficients.

### 3. The Calculated Electronic Properties for Isomer $4^6\sigma^8\text{B}$ with Additional Diffuse Functions

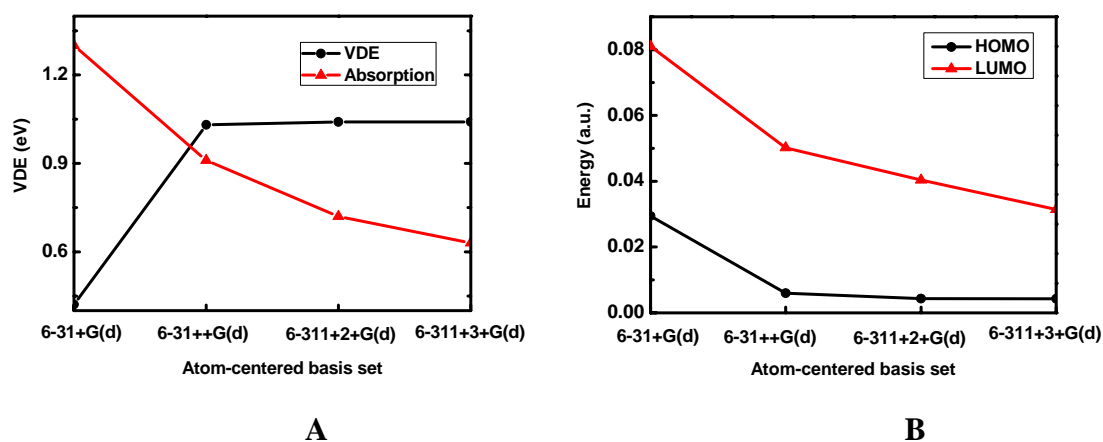

**Figure S7.** Calculated VDEs, vis absorption maxima (A), and the HOMO and LUMO energies (B) of the  $(\text{H}_2\text{O})_{24}^- 4^6\sigma^8\text{B}$  isomer, with respect to different atom-centered basis sets at the B3LYP level.

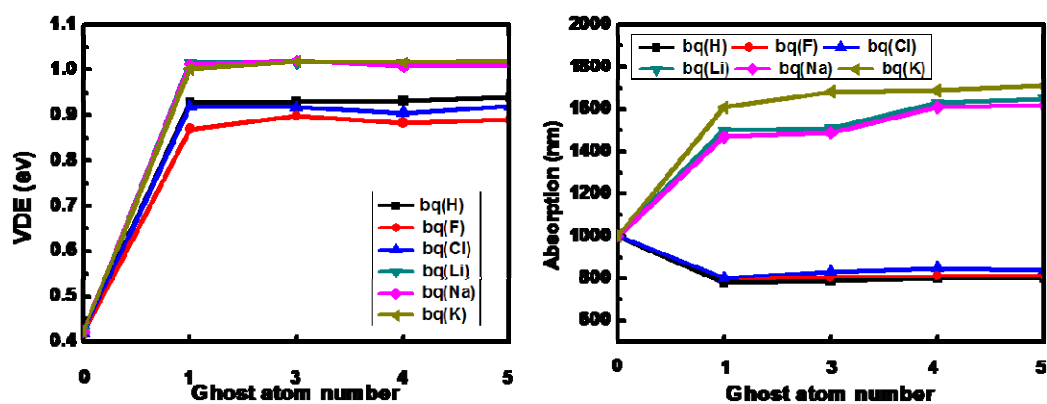

**Figure S8.** The VDEs, vis absorption maxima for isomer  $(\text{H}_2\text{O})_{24}^-$ , and their dependence on the number and kinds of ghost atoms at the B3LYP level. The solid lines depict the results with low-quality atom-centered basis set [6-31+G(d)] augmented by ghost atoms at the 6-31++G(d) level. The considered ghost atom is H, F, Cl, Li, Na, and K atom, respectively.

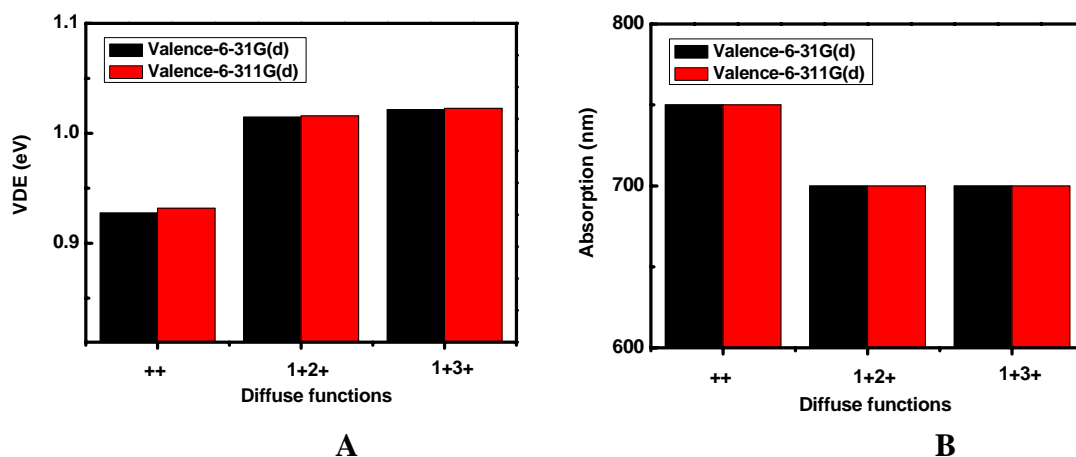

**Figure S9.** The VDEs (A) and vis absorption maxima (B) for the  $(\text{H}_2\text{O})_{24}^- 4^6 6^8 \text{B}$  isomer at the B3LYP level using fixed atom-centered basis set [6-31+G(d)] augmented by one H ghost atom with different ghost-atom-based diffuse and valence functions.

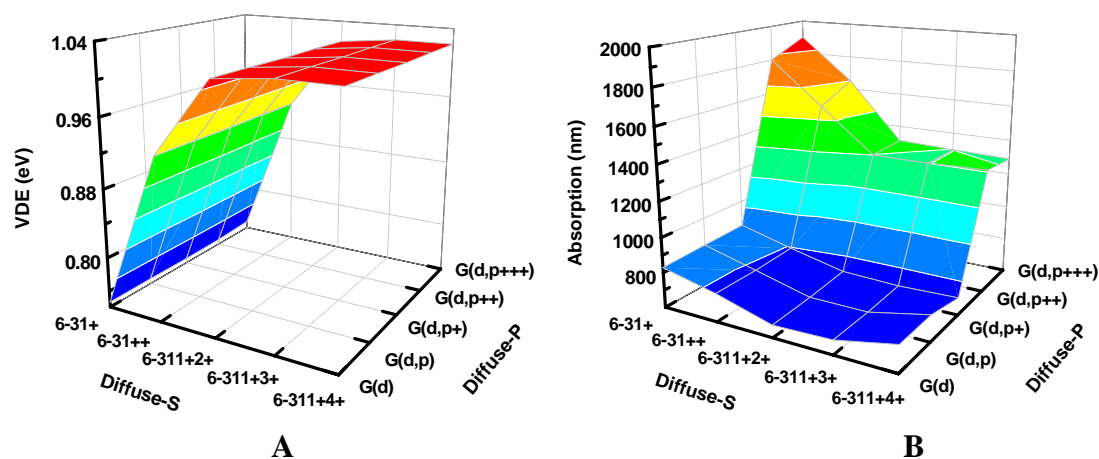

**Figure S10.** Calculated VDEs and vis absorption maxima for the  $(\text{H}_2\text{O})_{24}^- 4^6 6^8 \text{B}$  isomer at the B3LYP level using 6-31+G(d) atom-centered basis set augmented by one H ghost atom with different ghost-atom-based diffuse functions.

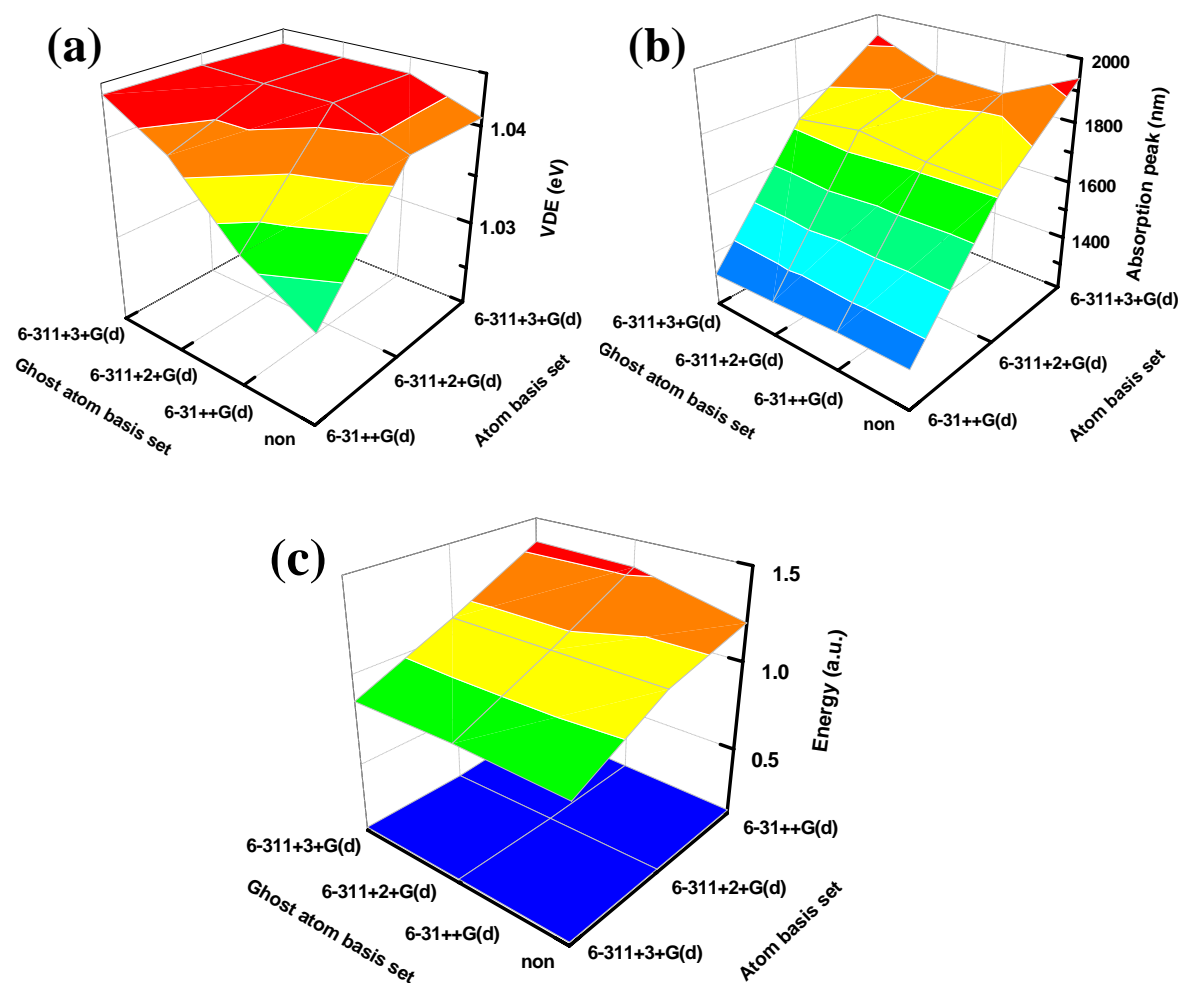

**Figure S11.** Calculated VDEs (a), vis absorption maxima (b) and HOMO/LUMO energies (c) for the  $(\text{H}_2\text{O})_{24}^- 4^6 6^8 \text{B}$  isomer, with respect to different basis sets at the B3LYP level. One H is selected as additional ghost atom.

**Table S2.** HOMO and LUMO Distributions for the isomer  $4^6\sigma^8\text{B}$  at the B3LYP level with different basis sets. The solid (S) and dotted (D) surface present the contour map with different isovalues. The detailed data and the density enclosed in the surface are both shown in the right bottom.

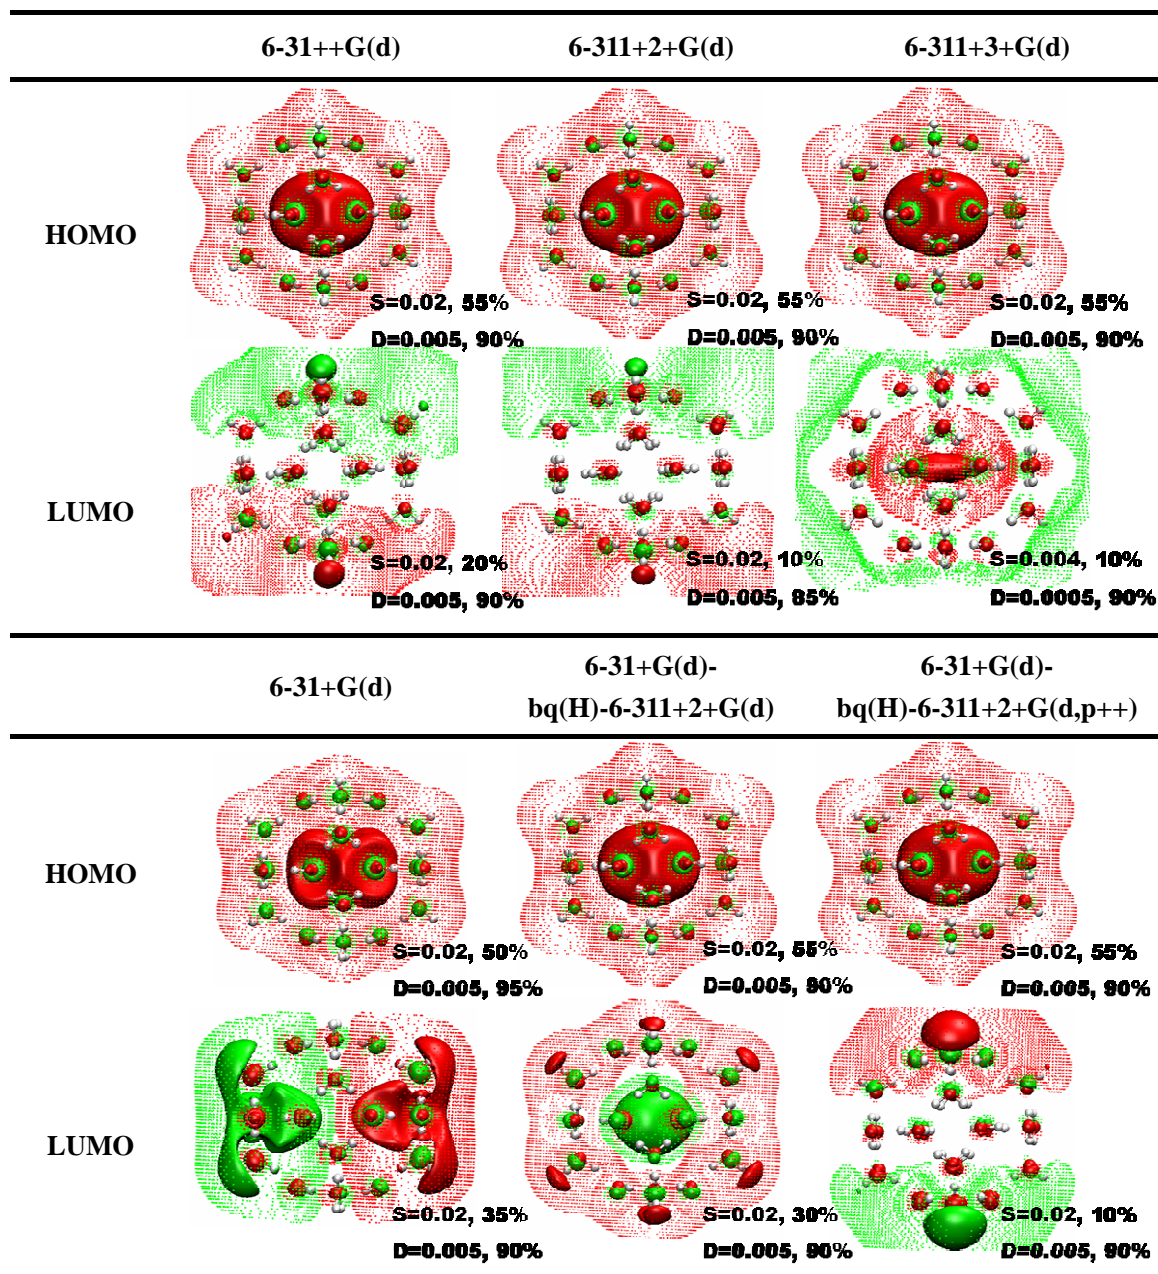

Supplement: c6cp04224d1.pdf [file c6cp04224d1.pdf]
